# Supplementary material for: Fast and broad-coverage lipidomics enabled by ion mobility-mass spectrometry
Source: Royal Society of Chemistry journal article supplement (doi:10.1039/d4an00751d), 2024-01-01
Supplement: d4an00751d1.pdf [file d4an00751d1.pdf]

*Supplementary information for*

## **Fast broad-coverage lipidomics enabled by ion mobility-mass spectrometry**

*Yuping Cai<sup>1</sup>, Xi Chen<sup>1,2</sup>, Fandong Ren<sup>1</sup>, Hongmiao Wang<sup>1,2</sup>, Yandong Yin<sup>1</sup>, and Zheng-Jiang Zhu<sup>1,3,\*</sup>*

<sup>1</sup> Interdisciplinary Research Center on Biology and Chemistry, Shanghai Institute of Organic Chemistry, Chinese Academy of Sciences, Shanghai, 200032 P. R. China

<sup>2</sup> University of Chinese Academy of Sciences, Beijing, 100049 P. R. China

<sup>3</sup> Shanghai Key Laboratory of Aging Studies, Shanghai, 201210 P. R. China

### **Corresponding Author**

Z.J.Z (jiangzhu@sioc.ac.cn)

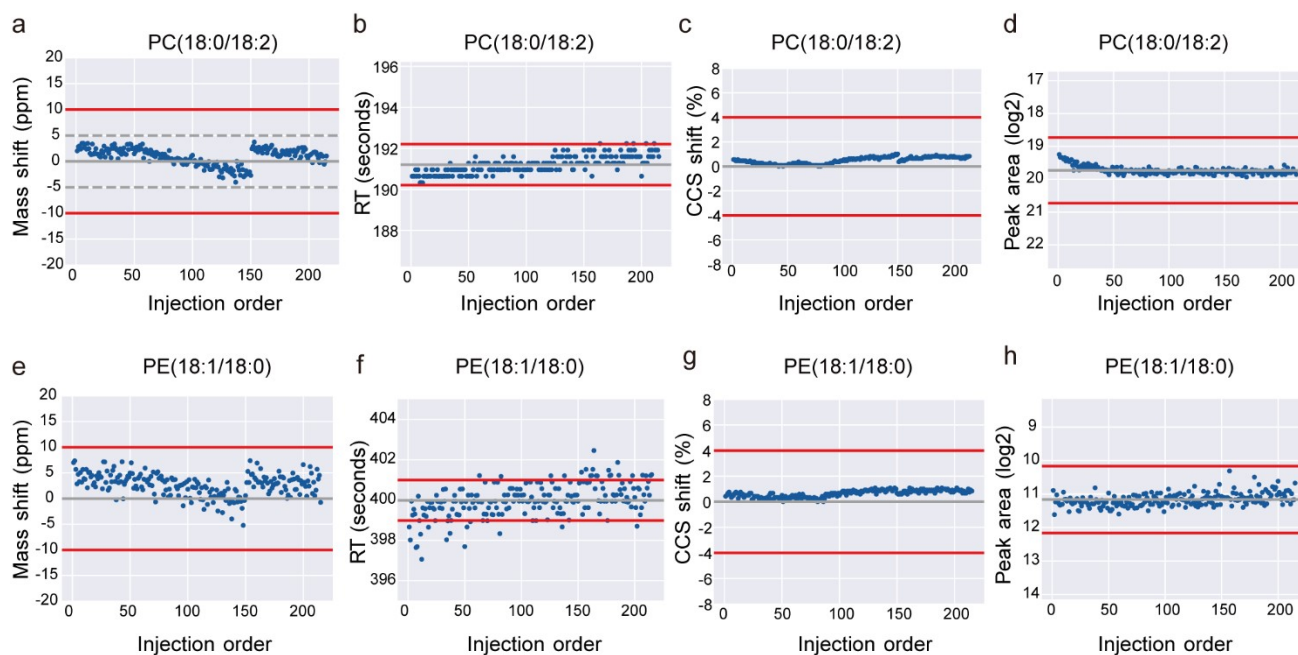

**Fig. S1. Stability of the 8-minute LC–IM–MS method regarding mass accuracy, retention time, CCS, and lipid abundance.** (a) Mass shift, (b) RT shift, (c) CCS shift, and (d) intensity deviation of PC(18:0/18:2) over the course of 215 sample injections. (e) Mass shift, (f) RT shift, (g) CCS shift, and (h) intensity deviation of PE(18:1/18:0) over the course of 215 sample injections.

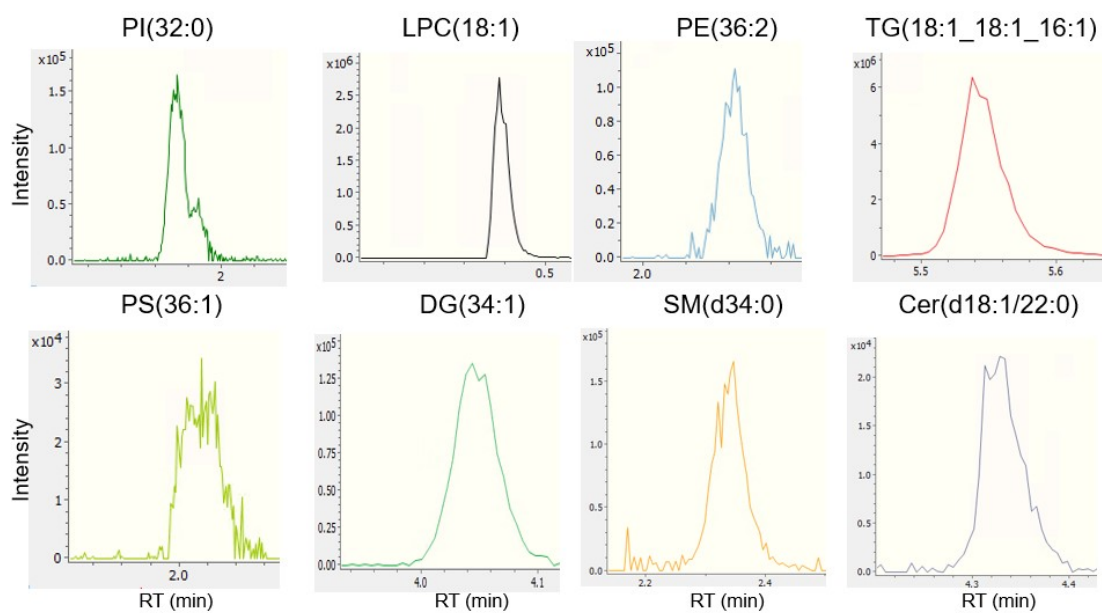

**Supplementary Fig. S2. The extracted ion chromatograms (EICs) of different lipid species from NIST human plasma and BioMix sample.**

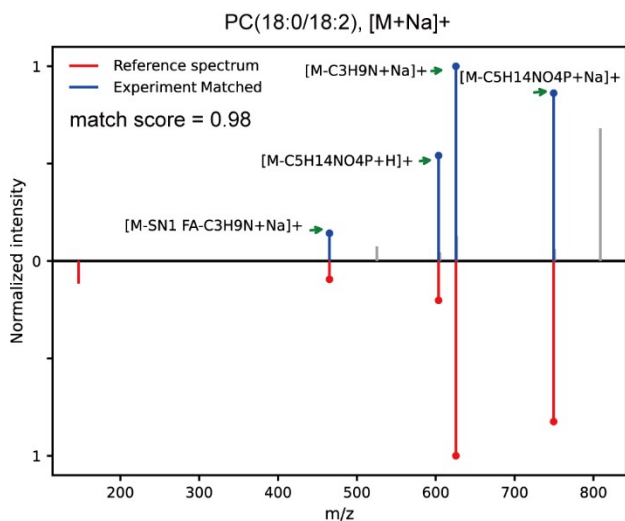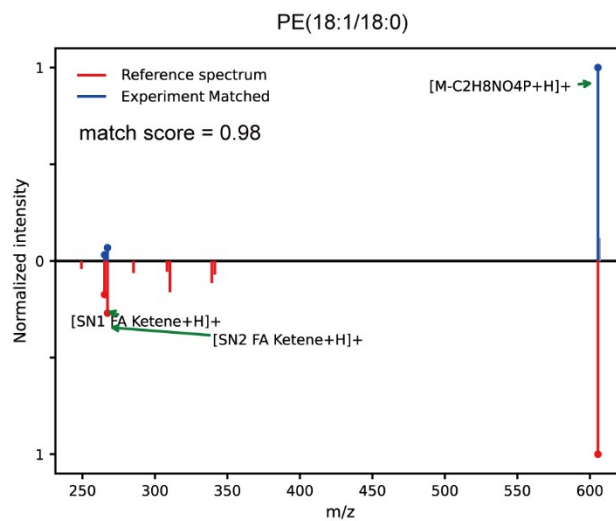

**Fig. S3. Mirror plots of MS/MS match for PC(18:0/18:2) and PE(18:1/18:0).**

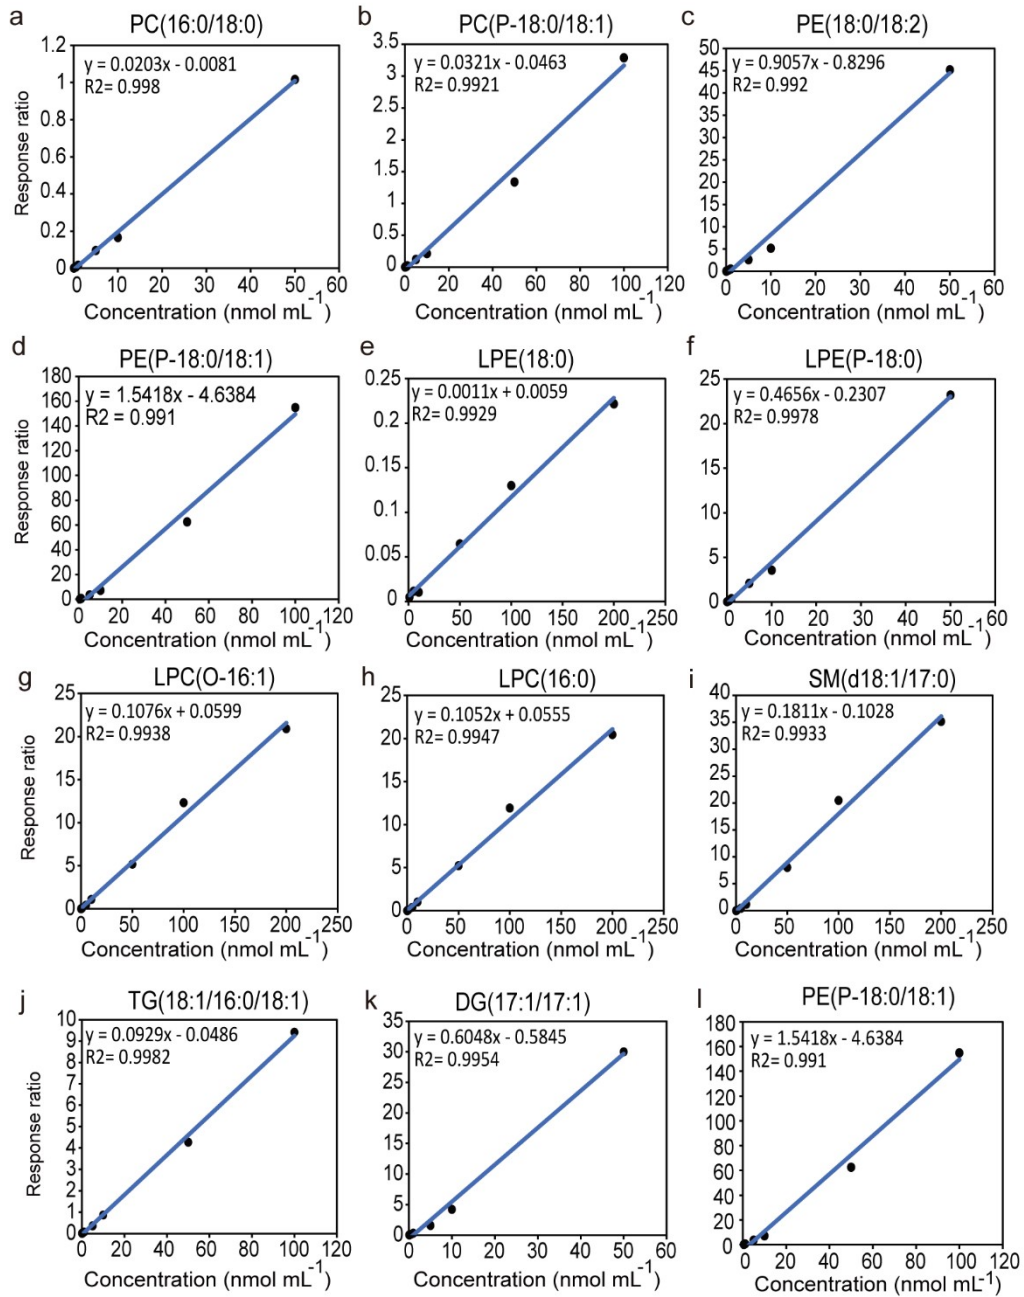

**Fig. S4. Calibration curves for quantification of individual lipid classes.**

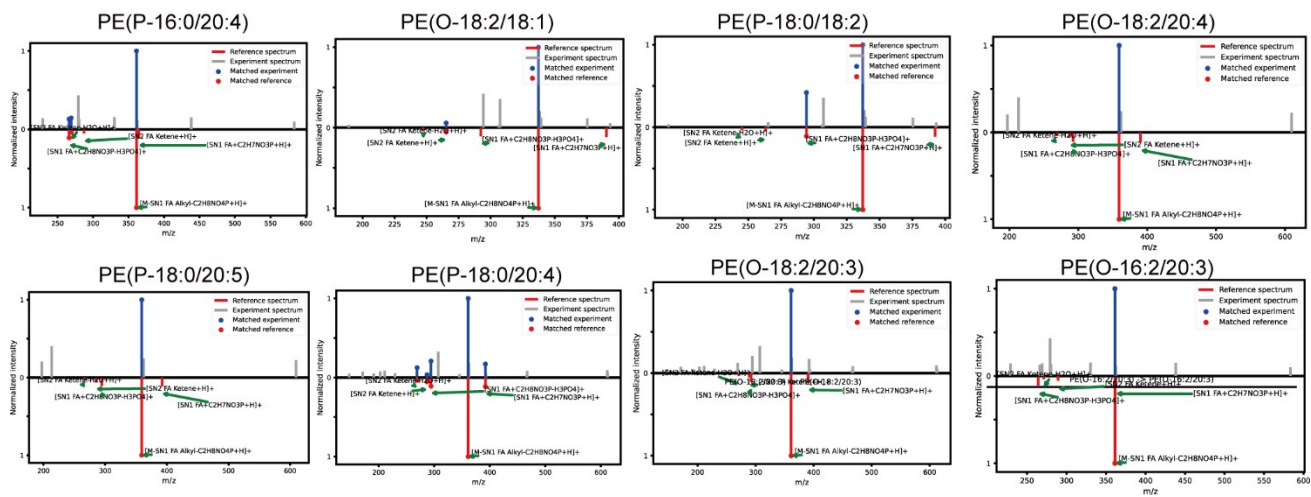

**Fig. S5. Mirror plots of MS/MS match for ether phospholipid species.**

**Supplementary Table S1.** Parameter set of Me4DX for data processing.

| <b>Parameter</b>                                                                 | <b>Value</b>                               |
|----------------------------------------------------------------------------------|--------------------------------------------|
| <b># MS2 spectral dereplication</b>                                              |                                            |
| Absolute intensity cutoff of fragment ion                                        | 30 counts                                  |
| Relative intensity cutoff of fragment ion                                        | 0.01                                       |
| <i>m/z</i> tolerance for precursor ion match                                     | 20 ppm or 0.004 Da for <i>m/z</i> < 200 Da |
| Maximum/minimum RT tolerance for clustering MS2                                  | 20 s and 10 s                              |
| Maximum/minimum mobility tolerance for clustering MS2                            | 0.030 and 0.015 V·s/cm <sup>2</sup>        |
| 3D distance cutoff in HCA                                                        | 1                                          |
| <b># The bottom-up assembly algorithm for 4D peak detection</b>                  |                                            |
| <i>m/z</i> tolerance for MS1 data point search                                   | 20 ppm or 0.004 Da for <i>m/z</i> < 200 Da |
| Mobility range to reconstruct ion mobilogram                                     | 0.1 V·s/cm <sup>2</sup>                    |
| Frame range to reconstruct ion chromatogram                                      | 30 frames                                  |
| Peak span of EIM and EIC                                                         | 13 points and 11 points                    |
| RT difference tolerance of detected EIC apex and precursor RT                    | 10 s                                       |
| Mobility difference tolerance of detected EIC apex and precursor RT              | 0.015 V·s/cm <sup>2</sup>                  |
| Frame range for signal integration                                               | 5 frames                                   |
| Mobility range for signal integration                                            | 0.015 V·s/cm <sup>2</sup>                  |
| Signal-to-noise ratio cutoff                                                     | 3                                          |
| Normalized standard noise cutoff                                                 | 0.35                                       |
| <b># 4D peak alignment and grouping</b>                                          |                                            |
| <i>m/z</i> tolerance for landmark match                                          | 20 ppm or 0.004 Da for <i>m/z</i> < 200 Da |
| RT tolerance for landmark match                                                  | 30 s                                       |
| CCS tolerance for landmark match                                                 | 2%                                         |
| Dot-product cutoff for MS2 spectral match for landmark match                     | 0.8                                        |
| <i>m/z</i> bin size                                                              | 0.015 Da                                   |
| Mobility bin size                                                                | 0.015 V·s/cm <sup>2</sup>                  |
| Bandwidth of gaussian smoothing kernel to apply to the peak density chromatogram | 5 s                                        |
| Minimum fraction of samples necessary in at least one of the sample groups       | 0.5                                        |
| Frame range for gap filling                                                      | 5 frames                                   |
| Mobility range for gap filling                                                   | 0.015 V·s/cm <sup>2</sup>                  |
| <i>m/z</i> tolerance for gap filling                                             | 20 ppm or 0.004 Da for <i>m/z</i> < 200 Da |

**Supplementary Table S2.** Quantitative analysis information on each lipid class for NIST SRM 1950 human plasma and plasma samples of patients with CRC.

| Lipid class   | Adduct form                         | Internal standard     | Concentration of internal standard (nmol/mL) |
|---------------|-------------------------------------|-----------------------|----------------------------------------------|
| LPC           | [M+H] <sup>+</sup>                  | d7-LPC(18:1)          | 9.46                                         |
| LPC(P)/LPC(O) | [M+H] <sup>+</sup>                  | d7-LPC(18:1)          | 9.46                                         |
| LPE           | [M+H] <sup>+</sup>                  | d7-LPE(18:1)          | 2.05                                         |
| LPE(P)/LPE(O) | [M+H] <sup>+</sup>                  | d7-LPE(18:1)          | 2.05                                         |
| PC            | [M+H] <sup>+</sup>                  | d7-PC(15:0/18:1)      | 42.49                                        |
| PC(P)/PC(O)   | [M+H] <sup>+</sup>                  | d7-PC(15:0/18:1)      | 42.49                                        |
| PE            | [M+H] <sup>+</sup>                  | d7-PE(15:0/18:1)      | 1.41                                         |
| PE(P)/PE(O)   | [M+H] <sup>+</sup>                  | d7-PE(15:0/18:1)      | 1.41                                         |
| SM            | [M+H] <sup>+</sup>                  | d9-SM(d18:1/18:1)     | 8.13                                         |
| DG            | [M+NH <sub>4</sub> ] <sup>+</sup>   | d7-DG(15:0/18:1)      | 3.40                                         |
| TG            | [M+NH <sub>4</sub> ] <sup>+</sup>   | d7-TG(15:0/18:1/15:0) | 13.54                                        |
| Cholesterol   | [M-H <sub>2</sub> O+H] <sup>+</sup> | d7-Cholesterol        | 50.84                                        |
| CE            | [M+NH <sub>4</sub> ] <sup>+</sup>   | d7-CE(18:1)           | 106.44                                       |



**Supplement****ary Table****S3. The LC**

gradients of

individual

LC–IM–MS

methods.

| Time<br>(min) | Time<br>(min) | Time<br>(min) | Time<br>(min) | Time<br>(min) | A(%)  | B(%)  | Flow(mL/min) |
|---------------|---------------|---------------|---------------|---------------|-------|-------|--------------|
| 0.00          | 0.00          | 0.00          | 0.00          | 0.00          | 70.00 | 30.00 | 0.50         |
| 1.00          | 1.00          | 0.50          | 1.50          | 1.50          | 70.00 | 30.00 | 0.50         |
| 1.50          | 3.00          | 5.00          | 9.00          | 14.00         | 30.00 | 70.00 | 0.50         |
| 1.70          | 3.50          | 6.00          | 10.00         | 15.00         | 30.00 | 70.00 | 0.50         |
| 1.80          | 3.60          | 6.10          | 10.10         | 15.10         | 10.00 | 90.00 | 0.50         |
| 2.00          | 3.90          | 6.50          | 11.00         | 16.00         | 10.00 | 90.00 | 0.50         |
| 2.10          | 4.00          | 6.70          | 11.10         | 16.10         | 70.00 | 30.00 | 0.50         |
| 3.00          | 5.00          | 8.00          | 13.00         | 18.00         | 70.00 | 30.00 | 0.50         |

**Supplementary Table S4.** Summary of linear dynamic ranges, LOD, LOQ, and reproducibility for quantification.

| Lipid              | Conc. range<br>(nmol mL <sup>-1</sup> ) | Equation           | R2     | LOD*<br>(nmol mL <sup>-1</sup> ) | LOQ#<br>(nmol mL <sup>-1</sup> ) | RSD of<br>corresponding IS |
|--------------------|-----------------------------------------|--------------------|--------|----------------------------------|----------------------------------|----------------------------|
| PC(16:0/18:0)      | 0.05-50                                 | y = 0.0203x-0.0081 | 0.9987 | 0.01                             | 0.05                             | 13.7%                      |
| PC(P-18:0/18:1)    | 0.05-100                                | y = 0.0321x-0.0463 | 0.9921 | 0.01                             | 0.05                             | 13.7%                      |
| PE(18:0/18:2)      | 0.01-50                                 | y = 0.9057x-0.8296 | 0.9920 | 0.01                             | 0.01                             | 5.8%                       |
| PE(P-18:0/18:1)    | 0.5-100                                 | y = 1.5418x-4.6384 | 0.9910 | 0.01                             | 0.5                              | 8.7%                       |
| LPE(18:0)          | 1-200                                   | y = 0.0011x-0.0059 | 0.9929 | 1                                | 1                                | 10.5%                      |
| LPE(P-18:0)        | 0.05-50                                 | y = 0.4656x-0.2307 | 0.9579 | 0.01                             | 0.05                             | 8.1%                       |
| LPC(O-16:1)        | 0.01-200                                | y = 0.1076x+0.0599 | 0.9938 | 0.005                            | 0.01                             | 4.8%                       |
| LPC(16:0)          | 0.01-200                                | y = 0.1052x+0.0555 | 0.9947 | 0.005                            | 0.01                             | 9.8%                       |
| SM(d18:1/17:0)     | 0.05-200                                | y = 0.1811x-0.1028 | 0.9933 | 0.01                             | 0.05                             | 4.3%                       |
| TG(18:1/16:0/18:1) | 0.01-100                                | y = 0.0929x-0.0486 | 0.9982 | 0.005                            | 0.01                             | 3.4%                       |
| DG(17:1/17:1)      | 0.05-50                                 | y = 0.6048x-0.5845 | 0.9954 | 0.01                             | 0.05                             | 3.5%                       |
| CE(17:0)           | 0.1-10                                  | y = 0.0089x+0.0037 | 0.9824 | 0.01                             | 0.1                              | 2.8%                       |
| cholesterol        | 5-200                                   | y = 0.0186x+0.0444 | 0.9907 | 0.5                              | 5                                | 8.1%                       |

\*LOD was estimated with signal to noisy (S/N) more than three.

#LOQ was estimated with signal to noisy (S/N) more than ten.

**Supplementary Table S5.** Demographics of patients with CRC recruited in this study.

| <b>Characteristics</b> | <b>Total (n=23)</b> |
|------------------------|---------------------|
| Age (mean±s.d., year)  | 58.74±12.42         |
| BMI (mean±s.d.)        | 23.43±2.97          |
| Stage (II/III/IV)      |                     |
| I                      | 4                   |
| II                     | 14                  |
| III                    | 10                  |
| IV                     | 2                   |
